# Supplementary material for: Identification of family-determining residues in PHD fingers
Source: PubMed Central journal article supplement — Nucleic Acids Res. 2010 Nov 8;39(5):1666–79. doi: 10.1093/nar/gkq947 (PMC3061080; doi:10.1093/nar/gkq947), 2010-11-08
Supplement: supp_gkq947_Support1.pdf [file supp_gkq947_Support1.pdf]

Q23DQ2\_TETTH  
B0X8B0\_CULQU  
A8WS31\_CAEBR  
A7SKJ2\_NEMVE  
A7SSY4\_NEMVE  
A8Q121\_BRUMA  
C3YLI3\_BRAFL  
TAF3\_CHICK  
A7USJ1\_ANOGA  
B3RWW1\_TRIAD  
Q17909\_CAEEL  
A8X595\_CAEBR  
B2W7Y7\_PYRTR  
C3Y603\_BRAFL  
A8X3V5\_CAEBR  
B6AK05\_9CRYT  
A9CTF3\_ENTBH  
B0CPJ8\_LACBS  
B8P2U0\_POSPM  
A9SPZ8\_PHYPA  
Q5K9G8\_CRYNE  
A9V9F9\_MONBE  
B9PXJ9\_TOXGO  
Q54XU3\_DICDI  
Q2QPI8\_ORYSJ  
B6JY05\_SCHJY  
B3N5A4\_DROER  
B3RV05\_TRIAD  
B7QJG8\_IXOSC  
Q4STB9\_TETNG  
A8MUS2\_HUMAN  
Q4H2T0\_CIOIN  
A7SN37\_NEMVE  
C4QEF1\_SCHMA  
Q590G3\_ATEGE  
KDM5B\_CHICK  
Q8VCQ4\_MOUSE  
Q4SS52\_TETNG  
KD5BB\_DANRE  
Q00WV8\_OSTTA  
C1MZV4\_9CHLO  
Q237F1\_TETTH  
Q6BHR2\_DEBHA  
A5DW02\_LODEL  
C4QZZ0\_PICPA  
C5DXP7\_ZYGRO  
Q75C04\_ASHGO  
A0DNH3\_PARTE  
A0BQ64\_PARTE  
C4Q7S0\_SCHMA  
A8JBD1\_CHLRE  
A9TZD0\_PHYPA  
A9TSM0\_PHYPA  
B9RHA1\_RICCO  
Q43479\_HORVU  
A9SL26\_PHYPA  
C1FF07\_9CHLO  
C1MGF2\_9CHLO  
A4RV78\_OSTLU  
Q01BV8\_OSTTA  
A9USV7\_MONBE  
B3RIC2\_TRIAD  
A7S9X9\_NEMVE  
Q6P2C5\_HUMAN  
B7P7A8\_IXOSC  
A8NWQ4\_BRUMA  
NU301\_CAEEL.  
C3ZMT1\_BRAFL

A7RUH2\_NEMVE  
B4QKV1\_DROSI  
B4DJV8\_HUMAN  
B7QLX5\_IXOSC  
Q1ZXQ2\_DICDI  
A8IIE9\_CHLRE  
A9NZB9\_PICSI  
B6TEL3\_MAIZE  
A0FK66\_MEDTR  
C0PH64\_MAIZE  
B6T3I2\_MAIZE  
A8N1Q9\_COPC7  
Q0UKN9\_PHANO  
C4PZL4\_SCHMA  
Q5CZT7\_DANRE  
Q569M5\_XENLA  
B3S1Y6\_TRIAD  
A8MY65\_HUMAN  
B7P617\_IXOSC  
A7RN25\_NEMVE  
B3M2Q4\_DROAN  
Q173D7\_AEDAE  
B3RZ41\_TRIAD  
B2W7E0\_PYRTR  
C4QG56\_SCHMA  
B3MUL1\_DROAN  
B3NAS2\_DROER  
Q5KE45\_CRYNE  
B8BTQ1\_THAPS  
A7SU49\_NEMVE  
C3ZAD7\_BRAFL  
Q5R7Q2\_PONAB  
Q5BXE6\_SCHJA  
Q16PD3\_AEDAE  
Q0U0J6\_PHANO  
C5GA01\_AJEDE  
Q6C7S7\_YARLI  
SPP1\_SCHPO  
A9VBD2\_MONBE  
A9UTJ6\_MONBE  
A6SAW9\_BOTFB  
Q2KFA0\_MAGGR  
Q7SEV4\_NEUCR  
Q0V0T1\_PHANO  
C3YMW3\_BRAFL  
A8Q3Z4\_MALGO  
A8N8X8\_COPC7  
B0CTV5\_LACBS  
Q5KE61\_CRYNE  
Q4PHH0\_USTMA  
Q9HFW4\_USTMA  
A8Q274\_MALGO  
A5DPE6\_PICGU  
C4XWZ8\_CLALS  
C5MFH6\_CANTR  
Q6BTA2\_DEBHA  
A3GFU6\_PICST  
C4QZF1\_PICPA  
Q6CBR1\_YARLI  
A4QU39\_MAGGR  
MSC1\_SCHPO.1  
A0DES3\_PARTE  
C5E2A6\_LACTH  
C5E4N6\_ZYGRO  
A6ZMN6\_YEAS7  
A0EIB9\_PARTE  
A0C3R3\_PARTE  
A8ISL4\_CHLRE

Q6A1N3\_EUPVA  
A8NR59\_BRUMA  
C4QUB7\_SCHMA  
C1MYU2\_9CHLO  
C1E7J5\_9CHLO  
B9SHH0\_RICCO  
A4S819\_OSTLU  
Q00UM0\_OSTTA  
Q5K9N1\_CRYNE  
A7RXJ4\_NEMVE  
B0XC54\_CULQU  
A8Q2T9\_BRUMA  
C4QAL0\_SCHMA  
A9UYR1\_MONBE  
C3YVL7\_BRAFL  
B2W2X4\_PYRTR  
A4RM86\_MAGGR  
B6Q615\_PENMQ  
A0CTN1\_PARTE  
A0C2R0\_PARTE  
B8P4P6\_POSPM  
A8NYX1\_COPC7  
A8PG84\_COPC7  
Q4P8M0\_USTMA  
Q55PI5\_CRYNE  
A8QA13\_MALGO  
B9GZZ6\_POPTR  
Q4P9G9\_USTMA  
B8PKX5\_POSPM  
B0D3Z9\_LACBS  
B2VYH2\_PYRTR  
B6HTW2\_PENCW  
A4R4L1\_MAGGR  
Q8WZU5\_NEUCR  
A8N3W1\_COPC7  
B6K3P0\_SCHJY  
C4R8L4\_PICPA  
Q6FSZ9\_CANGA  
Q4PFC5\_USTMA  
Q6FKM6\_CANGA  
B0CNH2\_LACBS  
B6K4R6\_SCHJY  
C5DSE0\_ZYGRO  
Q6CJR6\_KLULA  
Q759R6\_ASHGO  
A6ZNR6\_YEAS7  
A7TDS0\_VANPO  
C4V9I2\_9MICR  
Q9XWJ8\_CAEEL  
YNG2\_KLULA  
YNG2\_YARLI  
C4R0B2\_PICPA  
A5DVA1\_LODEL  
A1D966\_NEOFI  
B2WKC5\_PYRTR  
Q2HE45\_CHAGB  
A7EFZ6\_SCLS1  
C4Q0G8\_SCHMA  
C4R674\_PICPA  
Q6CGP6\_YARLI  
Q5Z405\_ORYSJ  
A7QIW0\_VITVI  
A9U5B9\_PHYPA  
Q8SUD3\_ENCCU  
A4S6N7\_OSTLU  
Q5KI50\_CRYNE  
A2FU09\_TRIVA  
Q16PA1\_AEDAE

Q17N66\_AEDAE  
A7UUW2\_ANOGA  
A7UUV9\_ANOGA  
A7UUV4\_ANOGA  
A9TAN5\_PHYPA  
B9RCU9\_RICCO  
C1EJ22\_9CHLO  
B0W916\_CULQU  
Q6A4R2\_AEDAL  
A0NAY0\_ANOGA  
A7SLB0\_NEMVE  
C5LC89\_9ALVE  
C5L4U2\_9ALVE  
C3YLR7\_BRAFL  
Q55AQ4\_DICDI  
B0X0K9\_CULQU  
MLO2\_SCHPO  
UBR7\_DICDI  
B0D6M9\_LACBS  
Q6FSH3\_CANGA  
Q75D56\_ASHGO  
Q6CR98\_KLULA  
B7PXZ5\_IXOSC  
A9SMB7\_PHYPA  
A9RWF9\_PHYPA  
Q6ZI16\_ORYSJ  
Q5Z4Z5\_ORYSJ  
Y3228\_ARATH  
B9SYY6\_RICCO  
A7PMB8\_VITVI  
B9RUU8\_RICCO  
B9IJN2\_POPTR  
Q7F8S8\_ORYSJ  
Q9SGH2\_ARATH  
Q9N5L9\_CAEEL  
Q6ZJM9\_ORYSJ  
C0PIM9\_MAIZE  
O64559\_ARATH  
A9SM51\_PHYPA  
O80659\_ARATH  
B9S2S4\_RICCO  
A5C9X0\_VITVI  
B9N6B9\_POPTR  
B9SPQ8\_RICCO  
A7QXM1\_VITVI  
B9SP83\_RICCO  
Q0JD71\_ORYSJ  
C0PI29\_MAIZE  
C1N6Q3\_9CHLO  
C1N2K0\_9CHLO  
C1FIL3\_9CHLO  
C1FI08\_9CHLO  
C1N497\_9CHLO  
YQF7\_SCHPO  
B6JZF4\_SCHJY  
Q00V17\_OSTTA  
A4S7P2\_OSTLU  
A7PGG8\_VITVI  
B6U0S2\_MAIZE  
Q10MN1\_ORYSJ  
A9RAY8\_PHYPA  
A4QT62\_MAGGR  
A6RVD2\_BOTFB  
B6HJJ4\_PENCW  
C5FMG9\_MICCA  
A2QK11\_ASPNC  
Q5CVC2\_CRYPV  
A7ANX1\_BABBO

Q4N1W3\_THEPA  
Q7RCY4\_PLAYO  
B9PVX3\_TOXGO  
A8HU27\_CHLRE  
Q4DIY7\_TRYCR  
Q387D3\_9TRYP  
Q4FYR5\_LEIMA  
A9V3N8\_MONBE  
Q96DQ7\_HUMAN  
B1H2P8\_XENTR  
B3VCH6\_HUMAN  
Q4RSQ2\_TETNG  
B7G308\_PHATR  
B8LCL5\_THAPS  
B9FUP5\_ORYSJ  
Q94CK2\_ARATH  
A9TT48\_PHYPA  
Q70JP3\_WHEAT  
A7PQK3\_VITVI  
A6SRL7\_BOTFB  
Q2H944\_CHAGB  
B9PH08\_TOXGO  
B5YNU4\_THAPS  
B8BZ25\_THAPS  
C1MR96\_9CHLO  
Q229Y3\_TETTH  
Q5TPP1\_ANOGA  
A5DX32\_LODEL  
Q6BMY8\_DEBHA  
A3LVZ3\_PICST  
A5DL42\_PICGU  
A0NGH2\_ANOGA  
A2EEX4\_TRIVA  
A4HDI0\_LEIBR  
B8C8H9\_THAPS  
A9UU46\_MONBE  
C3VES4\_9HELO  
B0XM54\_ASPFC  
B8M059\_TALSN  
Q4YH02\_PLABE  
Q8IHU7\_PLAF7  
B8BWP7\_THAPS  
Q23D60\_TETTH  
A5HEI1\_ARATH  
B7FSH6\_PHATR  
A5B5M7\_VITVI  
C0HE87\_MAIZE  
Q0J8R2\_ORYSJ  
A7NWM7\_VITVI  
B9SLN7\_RICCO  
B9RRE7\_RICCO  
B9GNP6\_POPTR  
Q84NP5\_ORYSJ  
B8JIA4\_DANRE  
Q5BVH6\_SCHJA  
A7RZJ4\_NEMVE  
B7PEM2\_IXOSC  
Q18605\_CAEEL  
A8XSC8\_CAEBR  
Q19511\_CAEEL  
Q21375\_CAEEL  
B8B189\_ORYSI  
B9NGW2\_POPTR  
A7PSR4\_VITVI  
Q0WQA3\_ARATH  
A7QJA9\_VITVI  
B9S0A5\_RICCO  
A0A937\_IPOTF

Q0WVL8\_ARATH  
B9SCL9\_RICCO  
A5B5U4\_VITVI  
A4S1D2\_OSTLU  
Q54QM3\_DICDI  
Q675W8\_OIKDI  
YBE4\_SCHPO.1  
C4Y918\_CLALS  
Q6FMU0\_CANGA  
Q6C7S8\_YARLI  
A9RIF4\_PHYPA  
A8X3B0\_CAEBR  
A6NFV9\_HUMAN  
A9U364\_PHYPA  
A2WLG2\_ORYSI  
B9SZ29\_RICCO  
C1EDC5\_9CHLO  
C1EED6\_9CHLO  
C1MX99\_9CHLO  
Q01B45\_OSTTA  
C4Q561\_SCHMA  
B4MM36\_DROWI  
Q6IE91\_CIOIN  
A8QGX9\_BRUMA  
B6KKW1\_TOXGO  
A0DT54\_PARTE  
C5L4G0\_9ALVE  
A9VBZ8\_MONBE  
A0D6C6\_PARTE  
Q9MAS0\_ARATH  
A8BX60\_GIALA  
B8C860\_THAPS  
Q2H0M5\_CHAGB  
A6S3W6\_BOTFB  
Q7SA71\_NEUCR  
B2B2G0\_PODAN  
Q013K0\_OSTTA  
C1E429\_9CHLO  
A9TG42\_PHYPA  
A9RXF6\_PHYPA  
B9RJB8\_RICCO  
Q6C418\_YARLI  
C5K4M7\_9ALVE  
B2WCE9\_PYRTR  
B8MH56\_TALSN  
B6H981\_PENCW  
A6SHR8\_BOTFB  
Q1DXW0\_COCIM  
A2A8L9\_MOUSE  
A7TE76\_VANPO  
B5VIJ8\_YEAS6  
C5E4L9\_ZYGRO  
C4Y3U5\_CLALS  
A9V910\_MONBE  
A8Q0P1\_MALGO  
Q4P2T6\_USTMA  
A0DM48\_PARTE  
Q6K431\_ORYSJ  
A9SIE6\_PHYPA  
A4S1Y2\_OSTLU  
A8JHD4\_CHLRE  
A4RTZ1\_OSTLU  
A8X0D2\_CAEBR  
A8PFI7\_BRUMA  
B3RQ58\_TRIAD  
A7MCZ3\_HUMAN  
B4GPU2\_DROPE  
B4IPY6\_DROSE

B6ABB5\_9CRYPT  
Q0JPJ9\_ORYSJ  
ATX4\_ARATH.3  
B9I5A8\_POPTR  
C0SVF7\_ARATH  
B7G7A4\_PHATR  
A9RCZ8\_PHYPA  
B4MAY4\_DROVI  
PHF10\_MOUSE  
PHF10\_DANRE  
Q4H2G5\_CIOIN  
Q2A950\_CAEEL  
C4PX31\_SCHMA  
A9UUI9\_MONBE  
C1FHP6\_9CHLO  
C3YH08\_BRAFL  
C3S7I8\_CRAGI  
B7P0R7\_IXOSC  
C4Q1U1\_SCHMA  
Q5TH12\_HUMAN  
B6AJ35\_9CRYPT  
Q5CV66\_CRYPV  
B5VLR1\_YEAS6  
C5DJQ3\_LACTH  
A5DDN2\_PICGU  
A5E3W2\_LODEL  
Q6BME1\_DEBHA  
C4XWF4\_CLALS  
C4R2N4\_PICPA  
B8C3I9\_THAPS  
Q4N3F3\_THEPA  
A9UWT6\_MONBE  
B6AG96\_9CRYPT  
B8BUB0\_THAPS  
A0BNK8\_PARTE  
A0BMN2\_PARTE  
B4MYH9\_DROWI  
A9JT80\_DANRE  
B4DVW8\_HUMAN  
Q6ZMK3\_HUMAN  
B2GU33\_XENTR  
B4PPQ3\_DROYA  
B7PFS9\_IXOSC  
A7RLF4\_NEMVE  
Q1RPW5\_CIOIN  
C3YJ87\_BRAFL  
TRI33\_DANRE  
B5MCJ9\_HUMAN  
C4PX17\_SCHMA  
TIF1B\_MOUSE  
B7PUD8\_IXOSC  
C3XW80\_BRAFL  
C1BUB6\_9MAXI  
A7SYY9\_NEMVE  
B3RLD5\_TRIAD  
Q7QA92\_ANOGA  
B4K8X9\_DROMO  
A8QGE7\_BRUMA  
A8WQH5\_CAEBR  
Q17KN1\_AEDAE  
B0W7R0\_CULQU  
A6H7D5\_BOVIN  
Q00NW2\_ONCMY  
Q4TC98\_TETNG  
B0UXK0\_DANRE  
B3KV88\_HUMAN  
C3ZTG5\_BRAFL  
B3RYM1\_TRIAD

B3S4E5 TRIAD  
Q6X7S8 CHICK  
O64516 ARATH  
B9FCE9 ORYSJ  
A7QML6 VITVI  
A7SFB0 NEMVE  
B3MCM2 DROAN  
MLL2 HUMAN  
A8PCC4 BRUMA  
O46025 CAEEL  
A7SFA5 NEMVE  
MYST3 HUMAN  
YP99 CAEEL  
Q4SC22 TETNG  
Q4RKS6 TETNG  
Q7PYC9 ANOGA  
Q17A65 AEDAE  
B4LNY9 DROVI  
C4QCP3 SCHMA  
Q54SJ6 DICDI  
A8E7J7 DANRE  
B7QM38 IXOSC  
A4RVV6 OSTLU  
C1EE81 9CHLO  
B7FTD3 PHATR  
B7FZ99 PHATR  
A9TJL1 PHYPA  
B8LQP3 PICSI  
A7QT83 VITVI  
B9RG02 RICCO  
Q4P698 USTMA  
A8Q8I1 MALGO  
A8N885 COPC7  
Q55N63 CRYNE  
B0DD23 LACBS  
C1EIN0 9CHLO  
C1N5G9 9CHLO  
A8I0F5 CHLRE  
A9SL85 PHYPA  
Q0DDZ5 ORYSJ  
A7Nzs0 VITVI  
Q94G49 ARATH  
Q01A59 OSTTA  
A8X9E2 CAEBR  
A8Q9I0 BRUMA  
Q23QI3 TETHH  
Q4H2N4 CIOIN  
Q6DRP6 DANRE  
UHRF2 MOUSE  
UHRF1 MOUSE  
B7PB87 IXOSC  
C4Q1R6 SCHMA  
B0WGH8 CULQU  
Q4T4E8 TETNG  
B0D224 LACBS  
B4KER2 DROMO  
Q0IGB2 AEDAE  
A7RXL0 NEMVE  
Q1LWT3 DANRE  
B3RQ60 TRIAD  
Q9GRZ5 CAEEL  
C3YHH4 BRAFL  
Q4T742 TETNG  
Q86K47 DICDI  
Q755D1 ASHGO  
B3LHJ0 YEAS1  
A0C830 PARTE  
C5MDT2 CANTR



C4Y3U3\_CLALS  
A7F9K5\_SCLS1  
SNT2\_SCHPO  
B6K437\_SCHJY  
A8N8P9\_COPC7  
Q8J0X8\_CRYNE  
B8LKV4\_PICSI  
B0XG74\_CULQU  
B5RHT6\_MUSBA  
Q0JM27\_ORYSJ  
A7SZK7\_NEMVE  
B0JZH9\_XENTR  
Q4RLE2\_TETNG  
A8MVY7\_HUMAN  
B7Q596\_IXOSC  
O93291\_FUGRU  
C1M0K4\_SCHMA  
Q29FQ7\_DROPS  
B3S4B0\_TRIAD  
C3ZL59\_BRAFL  
A8P5J9\_BRUMA  
B6HJ32\_PENCW  
B8MPW9\_TALSN  
C1FZ07\_PARBR  
Q1DJS3\_COCIM  
Q0C8C8\_ASPTN  
RCO1\_YEAST  
C5DGP7\_LACTH  
Q6C630\_YARLI  
B2VSD1\_PYRTR  
C4R3R6\_PICPA  
Q4PEG1\_USTMA  
Q5KE26\_CRYNE  
C4Y581\_CLALS  
Q6BKT6\_DEBHA  
C5MG58\_CANTR  
B6JZS0\_SCHJY  
YA27\_SCHPO  
B6K5B4\_SCHJY  
YAC5\_SCHPO  
B8C1C8\_THAPS  
C1LZY0\_SCHMA  
B2RP50\_HUMAN  
Q7ZWN3\_XENLA  
B7PLQ0\_IXOSC  
B3NID0\_DROER  
A7S9J4\_NEMVE  
A7RUH5\_NEMVE  
Q4H2G3\_CIOIN  
B4PC37\_DROYA  
C4Q0P5\_SCHMA  
A9S4A6\_PHYPA  
A9TI22\_PHYPA  
B9RHW1\_RICCO  
Q0D6A3\_ORYSJ  
B3SBK2\_TRIAD  
A2AHG3\_MOUSE  
A7RH46\_NEMVE  
C3Z9M7\_BRAFL  
A9T8K9\_PHYPA  
Q4T6J5\_TETNG  
PF21B\_HUMAN  
B8CA53\_THAPS  
A8XS84\_CAEBR  
B4J645\_DROGR  
A7SFA6\_NEMVE  
C4Q2A1\_SCHMA  
PKL\_ARATH

B9RNX6\_RICCO  
B4NDI7\_DROWI  
Q2UB22\_ASPOR  
Q10ML5\_ORYSJ  
B9I9K8\_POPTR  
B4MSZ4\_DROWI  
B4Q0X4\_DROYA  
C4Q4Q4\_SCHMA  
B3RUC0\_TRIAD  
C3XQH2\_BRAFL  
Q4RDD2\_TETNG  
A7S985\_NEMVE  
B3S2J0\_TRIAD  
C3YIJ3\_BRAFL  
Q1RPX0\_CIOIN  
B7FU63\_PHATR  
B8C8P3\_THAPS  
A4SB05\_OSTLU  
C1MVF1\_9CHLO  
C1EG75\_9CHLO  
A8JDS9\_CHLRE  
B9IN73\_POPTR  
A9TMQ9\_PHYPA  
C4M4I8\_ENTHI  
B6H1E9\_PENCW  
B6K5H0\_SCHJY  
Q0V0E1\_PHANO  
Q6C5E8\_YARLI  
PHF1\_SCHPO  
B6JXB9\_SCHJY  
B6Q3I9\_PENMQ  
C1G169\_PARBR  
C4JYR9\_9EURO  
A1CR36\_ASPCL  
A2RB13\_ASPNC  
Q5B5F1\_EMENI  
A4RNZ9\_MAGGR  
A7EML9\_SCLS1  
Q7S971\_NEUCR  
B2AN43\_PODAN  
C1MQ36\_9CHLO  
C3Y6B1\_BRAFL  
B3RLA0\_TRIAD  
B7PBN3\_IXOSC  
Q17E25\_AEDAE  
B4JUF5\_DROGR  
C5KDG7\_9ALVE  
A5BNM2\_VITVI  
B3RI41\_TRIAD  
C1M0K3\_SCHMA  
Q8IH15\_DROME  
Q3V3T8\_MOUSE  
A8JG20\_CHLRE  
B2WM33\_PYRTR  
Q2GWJ9\_CHAGB  
A7E849\_SCLS1  
B6HK91\_PENCW  
Q0CE13\_ASPTN  
C0NTM6\_AJECG  
A9TE94\_PHYPA  
Q8LHD6\_ORYSJ  
B9RU15\_RICCO  
A7QF04\_VITVI  
C1MN72\_9CHLO  
C1EJJ7\_9CHLO  
A8NYS5\_COPC7  
Q84UZ2\_CHLRE  
A0DQ87\_PARTE

Q8J0Z1\_CRYNV  
A7ARA5\_BABBO  
Q5CFA1\_CRYHO  
C4Q9E3\_SCHMA  
Q23Q78\_TETTH  
B9IJN0\_POPTR  
A9TBW6\_PHYPA  
B8BYI8\_THAPS  
B7FPN8\_PHATR  
B7FPP0\_PHATR  
Q1RLC8\_CIOIN  
B5DFF8\_RAT  
A0JM02\_XENTR  
Q16R32\_AEDAE  
A8PQK2\_BRUMA  
KDM5\_CAEEL  
C1N1Z3\_9CHLO  
A8Q8M9\_BRUMA  
C5LDT6\_9ALVE  
B4KR11\_DROMO  
C4QL52\_SCHMA  
BAZ2B\_CHICK  
Q4S5L9\_TETNG  
A4RSK6\_OSTLU  
B9PU44\_TOXGO  
Q4N3B5\_THEPA  
Q54S19\_DICDI  
C1FFK8\_9CHLO  
A8NTY8\_COPC7  
Q55NW0\_CRYNE  
Q4P9B1\_USTMA  
A7SX13\_NEMVE  
A8QFY4\_BRUMA  
C4PXM5\_SCHMA  
Q4RYT8\_TETNG  
Q4H2K2\_CIOIN  
A4RVD8\_OSTLU  
C1N2E0\_9CHLO  
C1DZD1\_9CHLO  
Q23590\_CAEEL  
A9V4T8\_MONBE  
Q4TBV4\_TETNG  
BAZ1A\_XENLA  
B3SAI3\_TRIAD  
B7PE14\_IXOSC  
B0WSI2\_CULQU  
A9URH5\_MONBE  
A7SKI4\_NEMVE  
C3ZHW1\_BRAFL  
BAZ1B\_DANRE  
B4N950\_DROWI  
Q5N7H9\_ORYSJ  
B9EXF9\_ORYSJ  
B9FYN5\_ORYSJ  
Q681A8\_ARATH  
A4S6N8\_OSTLU  
B9PW76\_TOXGO  
C5KRY5\_9ALVE  
B7G638\_PHATR  
B0WB10\_CULQU  
A0DH07\_PARTE  
Q53MN0\_ORYSJ  
A7PC93\_VITVI  
C1E0U0\_9CHLO  
C1MK22\_9CHLO  
C1MK20\_9CHLO  
Q8I5K3\_PLAF7  
B6AGX8\_9CRYT

A8XJ02\_CAEBR  
C4Q4P4\_SCHMA  
Q17MR6\_AEDAE  
Q5K9S8\_CRYNE  
C1E1G8\_9CHLO  
C5LFQ4\_9ALVE  
Q4PBA8\_USTMA  
A8Q8U8\_MALGO  
C3ZRF1\_BRAFL  
A7AM35\_BABBO  
Q4XW19\_PLACH  
TCF19\_PIG  
B3RV06\_TRIAD  
B4MUZ4\_DROWI  
A5WUR6\_DANRE  
JHD1\_YARLI  
Q0TX58\_PHANO  
C5FNY1\_MICCA  
C5JT21\_AJEDE  
A1DG14\_NEOFI  
JHD1\_CANAL  
A5DT38\_LODEL  
C5M4L4\_CANTR  
A3GH35\_PICST  
JHD1\_DEBHA  
C4Y832\_CLALS  
A5D9U8\_PICGU  
B3MZ96\_DROAN  
A0DIL3\_PARTE  
A0BLQ8\_PARTE  
A0C688\_PARTE  
A0ED45\_PARTE  
A0CMR7\_PARTE  
A0DND2\_PARTE  
A0D700\_PARTE  
A0CIP4\_PARTE  
A0BZG1\_PARTE  
A0BFJ7\_PARTE  
Q22XR6\_TETTH  
A0EFW9\_PARTE  
A0DW40\_PARTE  
A0DYN3\_PARTE  
A0CA01\_PARTE  
A0CFU1\_PARTE  
A0DBK1\_PARTE  
A0CC38\_PARTE  
Q0IFY8\_AEDAE  
B0WB33\_CULQU  
Q17L06\_AEDAE  
Q17PX1\_AEDAE  
B0W8X1\_CULQU  
B7GD31\_PHATR  
B8BTF2\_THAPS  
Q4T7T3\_TETNG  
Q4SF72\_TETNG  
B3MY63\_DROAN  
A8NG85\_COPC7  
B0D233\_LACBS  
A9V4L9\_MONBE  
B3MTV1\_DROAN  
A2DVA7\_TRIVA  
A6ZQM1\_YEAS7  
A7EA13\_SCLS1  
A4RIW6\_MAGGR  
B2AQ62\_PODAN  
A6SNN0\_BOTFB  
BYE1\_SCHPO.3  
Q5DE15\_SCHJA

B2W973\_PYRTR  
C4JH15\_9EURO  
A8MST0\_HUMAN  
A9SMA9\_PHYPA  
B9DG12\_ARATH  
B8AXJ3\_ORYSI  
C4QGI7\_SCHMA  
A8XEC9\_CAEBR  
LIN59\_CAEEL  
B3LR80\_YEAS1  
C5DQL9\_ZYGRO  
C5DGL2\_LACTH  
BYE1\_CANGA  
A8NLE9\_BRUMA  
Q6M999\_NEUCR  
A4RKA7\_MAGGR  
C4R388\_PICPA  
SET3\_SCHPO  
Q6C330\_YARLI  
A8QA70\_MALGO  
Q5KET9\_CRYNE  
Q754J5\_ASHGO  
A7TNT0\_VANPO  
C4QV18\_PICPA  
Q6BXP2\_DEBHA  
Q02316\_LENED  
B8PKT6\_POSPM  
B6K3R4\_SCHJY  
CTI6\_SCHPO  
Q6FX05\_CANGA  
C5DZD6\_ZYGRO  
C4QW92\_PICPA  
Q55BQ0\_DICDI  
Q6C0F4\_YARLI  
A8PTH2\_MALGO  
A8N6Z2\_COPC7  
Q5KI88\_CRYNE  
B5DYI5\_DROPS  
P20L1\_HUMAN  
B7P8F1\_IXOSC  
A7SGK9\_NEMVE  
A2FNM6\_TRIVA  
A2DTH8\_TRIVA  
ASH1L\_MOUSE  
Q4H2L4\_CIOIN  
B0W2A0\_CULQU  
B7Q1Z2\_IXOSC  
A8PYA0\_BRUMA  
A9UZG3\_MONBE  
B3SC73\_TRIAD  
C4QKS2\_SCHMA  
A7TQK4\_VANPO  
A8XIF6\_CAEBR  
Q9U263\_CAEEL  
A8XTB2\_CAEBR  
C4Y0B9\_CLALS  
BYE1\_DEBHA  
A5E3F5\_LODEL  
B9WHI1\_CANDC  
BYE1\_PICGU  
A3LVP5\_PICST  
A8PYL3\_BRUMA  
B8BTQ0\_THAPS  
A2EGZ2\_TRIVA  
Q01GK7\_OSTTA  
C1MLV0\_9CHLO  
Q018Q6\_OSTTA  
A2XLE3\_ORYSI

Q9ZUA9\_ARATH  
B4G1Y2\_MAIZE  
Q93V55\_ARATH  
B9HVQ6\_POPTR  
B9T5F9\_RICCO  
Q7X6Y7\_ARATH  
B9S1T6\_RICCO  
Y1342\_ARATH  
B9RY52\_RICCO  
A9TTI0\_PHYPA  
A3CA04\_ORYSJ  
A8J2T9\_CHLRE  
A9SKI3\_PHYPA  
B9I0S9\_POPTR  
Q0UMC1\_PHANO  
Q5B712\_EMENI  
A4RPW2\_MAGGR  
A6RQZ4\_BOTFB  
Q5KL97\_CRYNE  
A8NT23\_COPC7  
B0DAJ4\_LACBS  
A7RGI7\_NEMVE  
A7SDI3\_NEMVE  
Q1JPR5\_MOUSE  
A7SF90\_NEMVE  
B3RR58\_TRIAD  
B7QBW6\_IXOSC  
B4NAH5\_DROWI  
A2E8E8\_TRIVA  
C5KN49\_9ALVE  
Q5CGK4\_CRYHO  
A2G5R9\_TRIVA  
A7EP54\_SCLS1  
Q2HAA3\_CHAGB  
A4QSZ7\_MAGGR  
C0NED1\_AJECG  
Q0V0L1\_PHANO  
A2FQF0\_TRIVA  
A2FG01\_TRIVA  
A2DVH1\_TRIVA  
Q8SWC8\_ENCCU  
Q4RW15\_TETNG
